# Supplementary material
Source: PubMed Central journal article supplement (PMC6537836)
Supplement: jamafacialplastsurg-21-237-s001.pdf [file jamafacialplastsurg-21-237-s001.pdf]

## Supplementary Online Content

Saxena RC, Friedman S, Bly RA, et al. Comparison of micro-computed tomography and clinical computed tomography protocols for visualization of nasal cartilage before surgical planning for rhinoplasty. *JAMA Facial*. Published online February 7, 2019. doi:10.1001/jamafacial.2018.1931

**eTable.** Region of Interest Analysis for Cartilage vs Boundary Across Micro-CT and Clinical CT Protocols

This supplementary material has been provided by the authors to give readers additional information about their work.

| <b>eTable.</b> Region of Interest Analysis for Cartilage vs Boundary Across Micro-CT and Clinical CT Protocols |                                                            |                                                                     |                                                                   |                                                                            |                                                                   |                                                                            |
|----------------------------------------------------------------------------------------------------------------|------------------------------------------------------------|---------------------------------------------------------------------|-------------------------------------------------------------------|----------------------------------------------------------------------------|-------------------------------------------------------------------|----------------------------------------------------------------------------|
| <i>Type of Scanner</i>                                                                                         | <i>Septal Cartilage (Mean ± StDev in Hounsfield Units)</i> | <i>Septal Cartilage Boundary (Mean ± StDev in Hounsfield Units)</i> | <i>Upper Lateral Cartilage (Mean ± StDev in Hounsfield Units)</i> | <i>Upper Lateral Cartilage Boundary (Mean ± StDev in Hounsfield Units)</i> | <i>Lower Lateral Cartilage (Mean ± StDev in Hounsfield Units)</i> | <i>Lower Lateral Cartilage Boundary (Mean ± StDev in Hounsfield Units)</i> |
| MicroCT                                                                                                        | 77.5 ± 0.4                                                 | 8.7 ± 0.2                                                           | 96.0 ± 0.6                                                        | 45.3 ± 0.6                                                                 | 124.5 ± 0.4                                                       | 82.7 ± 0.4                                                                 |
| Protocol A                                                                                                     | 78.9 ± 52.5                                                | 15.1 ± 125.6                                                        | 62.3 ± 55.5                                                       | 37.9 ± 77.2                                                                | 92.0 ± 56.2                                                       | 57.4 ± 49.1                                                                |
| Protocol B                                                                                                     | 53.9 ± 17.4                                                | -5.7 ± 45.7                                                         | 26.0 ± 16.8                                                       | 4.7 ± 35.6                                                                 | 55.7 ± 11.1                                                       | 34.6 ± 14.2                                                                |
| Protocol C                                                                                                     | 51.5 ± 13.4                                                | 8.8 ± 36.1                                                          | 32.0 ± 12.7                                                       | 13.8 ± 28.7                                                                | 47.6 ± 11.1                                                       | 31.3 ± 12.7                                                                |
| Protocol D                                                                                                     | 45.1 ± 23.0                                                | -43.1 ± 68.1                                                        | 28.4 ± 29.5                                                       | 7.1 ± 52.1                                                                 | 46.2 ± 15.1                                                       | 27.2 ± 13.9                                                                |
| Protocol E                                                                                                     | 61.0 ± 16.4                                                | 2.4 ± 42.8                                                          | 32.2 ± 20.6                                                       | 14.9 ± 27.3                                                                | 47.4 ± 16.1                                                       | 33.6 ± 19.0                                                                |
| <b>Summary Statistics</b>                                                                                      |                                                            |                                                                     |                                                                   |                                                                            |                                                                   |                                                                            |
|                                                                                                                | <i>Septal Cartilage</i>                                    | <i>Septal Cartilage Boundary</i>                                    | <i>Upper Lateral Cartilage</i>                                    | <i>Upper Lateral Cartilage Boundary</i>                                    | <i>Lower Lateral Cartilage</i>                                    | <i>Lower Lateral Cartilage Boundary</i>                                    |
| Mean                                                                                                           | 61.32                                                      | -2.30                                                               | 46.15                                                             | 20.62                                                                      | 68.90                                                             | 44.47                                                                      |
| Standard Error                                                                                                 | 5.73                                                       | 8.65                                                                | 11.35                                                             | 6.89                                                                       | 13.20                                                             | 8.79                                                                       |
| Median                                                                                                         | 57.45                                                      | 5.55                                                                | 32.10                                                             | 14.35                                                                      | 51.65                                                             | 34.10                                                                      |
| Mode                                                                                                           | #N/A                                                       | #N/A                                                                | #N/A                                                              | #N/A                                                                       | #N/A                                                              | #N/A                                                                       |
| Standard Deviation                                                                                             | 14.04                                                      | 21.19                                                               | 27.79                                                             | 16.87                                                                      | 32.34                                                             | 21.52                                                                      |
| Sample Variance                                                                                                | 197.11                                                     | 449.05                                                              | 772.35                                                            | 284.63                                                                     | 1,046.09                                                          | 463.20                                                                     |
| Kurtosis                                                                                                       | -1.82                                                      | 3.79                                                                | 1.48                                                              | -1.40                                                                      | 0.50                                                              | 1.28                                                                       |
| Skewness                                                                                                       | 0.44                                                       | -1.89                                                               | 1.52                                                              | 0.82                                                                       | 1.34                                                              | 1.46                                                                       |
| Range                                                                                                          | 33.80                                                      | 58.20                                                               | 70.00                                                             | 40.60                                                                      | 78.30                                                             | 55.50                                                                      |
| Minimum                                                                                                        | 45.10                                                      | -43.10                                                              | 26.00                                                             | 4.70                                                                       | 46.20                                                             | 27.20                                                                      |
| Maximum                                                                                                        | 78.90                                                      | 15.10                                                               | 96.00                                                             | 45.30                                                                      | 124.50                                                            | 82.70                                                                      |
| Sum                                                                                                            | 367.90                                                     | -13.80                                                              | 276.90                                                            | 123.70                                                                     | 413.40                                                            | 266.80                                                                     |
